# Supplementary material for: Protaetia brevitarsis Extract Attenuates RANKL-Induced Osteoclastogenesis by Inhibiting the JNK/NF-κB/PLCγ2 Signaling Pathway
Source: MDPI journal article supplement (doi:10.3390/nu15143193), 2023-07-19
Supplement: s1 [file s1]

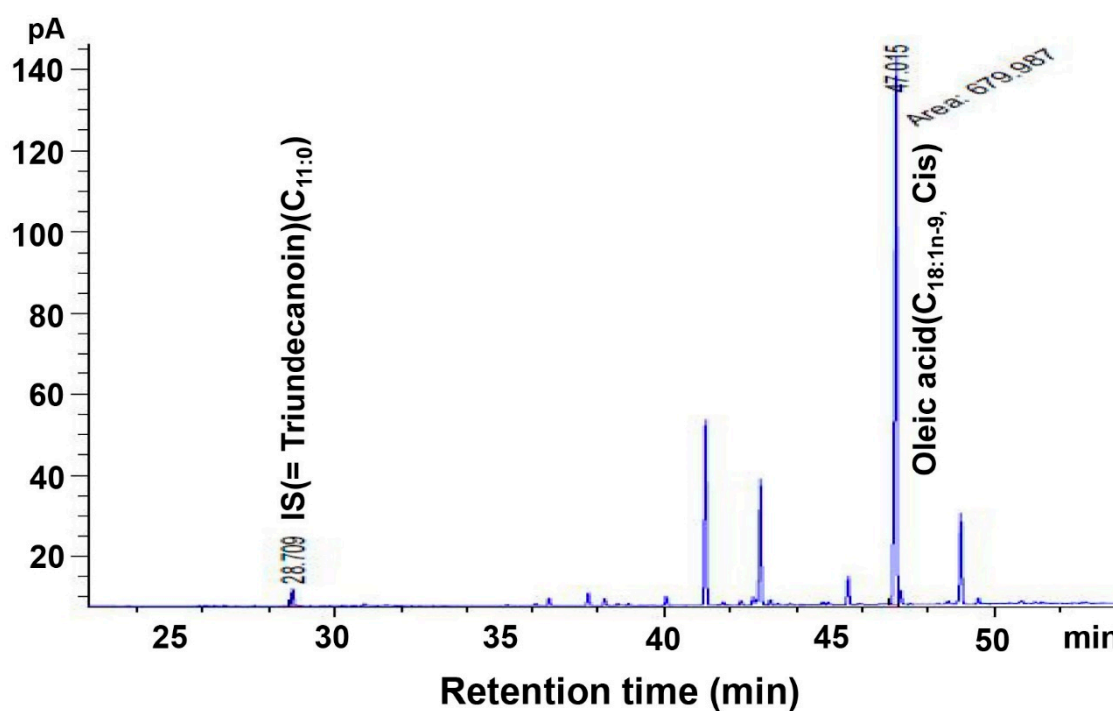

Supplementary Figure S1. Gas chromatography profile of *Protactia brevitaris*. Oleic acid was detected.

#### GC Analysis of *P. Brevitaris*

The larvae powder was subjected to GC profiling to analyze the constituents present in *P. brevitaris*. The *P. brevitaris* used in this study contained a large amount of oleic acid (suppl. Figure S1).
